# Supplementary material for: Three novel and various isopolymolybdate-based hybrids built from the carboxyl oxygen atoms of in situ ligands: substituent-tuned assembly, architectures and properties
Source: Royal Society of Chemistry journal article supplement (doi:10.1039/c6dt04185j), 2017-01-01
Supplement: c6dt04185j1.pdf [file c6dt04185j1.pdf]

## Three Novel and Various Isopolymolybdate-based Hybrids Built from the Carboxyl Oxygen Atoms of *In-situ* Ligands: Substituents-tuned Assembly, Architectures and Properties

Xiu-Li Wang,\* Rui Zhang, Xiang Wang, Hong-Yan Lin, Guo-Cheng Liu and Hui-Xiu

Zhang

**Table S1.** Selected bond lengths (Å) and angles (°) of compounds **1-3**.

| Compound 1                                                                                                                                                                                                              |            |                      |            |
|-------------------------------------------------------------------------------------------------------------------------------------------------------------------------------------------------------------------------|------------|----------------------|------------|
| Cu(1)-N1                                                                                                                                                                                                                | 1.978(4)   | Cu(1)-N1#5           | 1.977(4)   |
| Cu(1)-O(1)#4                                                                                                                                                                                                            | 2.017(4)   | Cu(1)-O(1)#6         | 2.017(4)   |
| Cu(1)-O(5)                                                                                                                                                                                                              | 2.372(4)   | Cu(1)-O(5)#5         | 2.372(4)   |
| N(1)#5-Cu(1)-N(1)                                                                                                                                                                                                       | 95.1(2)    | N(1)#5-Cu(1)-O(1)#6  | 99.72(15)  |
| N(1)-Cu(1)-O(1)#6                                                                                                                                                                                                       | 165.19(16) | N(1)#5-Cu(1)-O(1)#4  | 165.19(16) |
| N(1)-Cu(1)-O(1)#4                                                                                                                                                                                                       | 99.72(16)  | O(1)#6-Cu(1)-O(1)#4  | 65.5(2)    |
| N(1)#5-Cu(1)-O(5)                                                                                                                                                                                                       | 94.43(16)  | N(1)-Cu(1)-O(5)      | 92.35(16)  |
| O(1)#6-Cu(1)-O(5)                                                                                                                                                                                                       | 87.32(15)  | O(1)#4-Cu(1)-O(5)    | 84.24(15)  |
| C(1)#4-Cu(1)-O(5)                                                                                                                                                                                                       | 84.98(10)  | N(1)#5-Cu(1)-O(5)#5  | 92.35(16)  |
| N(1)-Cu(1)-O(5)#5                                                                                                                                                                                                       | 94.42(16)  | O(1)#6-Cu(1)-O(5)#5  | 84.24(15)  |
| O(1)#4-Cu(1)-O(5)#5                                                                                                                                                                                                     | 87.32(15)  | C(1)#4-Cu(1)-O(5)#5  | 84.98(9)   |
| O(5)-Cu(1)-O(5)#5                                                                                                                                                                                                       | 169.96(19) | Mo(1)-O(5)-Cu(1)     | 151.5(2)   |
| Symmetry transformations used to generate equivalent atoms for 1: #1 $x-y+2/3, x+1/3, -z+4/3$ ; #2 $y-1/3, -x+y+1/3, -z+4/3$ ; #3 $-y+1, x-y+1, z$ ; #4 $-x+y, -x+1, z$ ; #5 $y, x, -z+3/2$ ; #6 $-x+1, -x+y, -z+3/2$ . |            |                      |            |
| Compound 2                                                                                                                                                                                                              |            |                      |            |
| Cu(1)-O(30)                                                                                                                                                                                                             | 1.946(8)   | Cu(1)-O(27)          | 1.89(4)    |
| Cu(1)-N(1)                                                                                                                                                                                                              | 2.015(10)  | Cu(1)-O(1W)          | 1.989(13)  |
| Cu(1)-O(5)                                                                                                                                                                                                              | 1.994(8)   | Cu(2)-O(26)          | 1.943(8)   |
| Cu(2)-O(25)#2                                                                                                                                                                                                           | 1.946(7)   | Cu(2)-N(2)#3         | 1.962(9)   |
| Cu(2)-N(4)                                                                                                                                                                                                              | 1.973(9)   | Cu(2)-O(4)#4         | 2.369(8)   |
| N(2)-Cu(2)#5                                                                                                                                                                                                            | 1.962(9)   | O(4)-Cu(2)#6         | 2.369(8)   |
| O(25)-Cu(2)#2                                                                                                                                                                                                           | 1.946(9)   | O(30)-Cu(1)-O(27)    | 95.0(11)   |
| O(30)-Cu(1)-N(1)                                                                                                                                                                                                        | 91.8 (4)   | O(27)-Cu(1)-N(1)     | 164.5(9)   |
| O(30)-Cu(1)-O(1W)                                                                                                                                                                                                       | 131.7(6)   | O(27)-Cu(1)-O(1W)    | 87.5(7)    |
| N(1)-Cu(1)-O(1W)                                                                                                                                                                                                        | 90.5(5)    | O(30)-Cu(1)-O(5)     | 141.1(4)   |
| O(27)-Cu(1)-O(5)                                                                                                                                                                                                        | 82.4(10)   | N(1)-Cu(1)-O(5)      | 100.9(4)   |
| O(1W)-Cu(1)-O(30)                                                                                                                                                                                                       | 148.7(5)   | C(14)-N(1)-Cu(1)     | 120.8(8)   |
| C(12)-N(1)-Cu(1)                                                                                                                                                                                                        | 132.7(7)   | O(26)-Cu(2)-O(25)#2  | 91.8(3)    |
| O(26)-Cu(2)-N(2)#3                                                                                                                                                                                                      | 167.4(4)   | O(25)#2-Cu(2)-N(2)#3 | 90.0(3)    |

|                      |          |                     |          |
|----------------------|----------|---------------------|----------|
| O(26)-Cu(2)-N(4)     | 89.0(3)  | O(25)#2-Cu(2)-N(4)  | 178.3(4) |
| N(2)#3-Cu(2)-N(4)    | 89.5(4)  | O(26)-Cu(2)-O(4)#4  | 103.5(3) |
| O(25)#2-Cu(2)-O(4)#4 | 84.8(3)  | N(2)#3-Cu(2)-O(4)#4 | 89.0(4)  |
| N(4)-Cu(2)-O(4)#4    | 93.6(3)  | C(15)-N(2)-Cu(2)#5  | 127.9(7) |
| C(9)-N(2)-Cu(2)#5    | 123.8(7) | Mo(3)-O(4)-Cu(2)#6  | 152.0(4) |
| C(16)-N(4)-Cu(2)     | 123.0(7) | C(4)-N(4)-Cu(2)     | 129.3(7) |
| C(7)-O(25)-Cu(2)#2   | 131.9(7) | Mo(8)-O(26)-Cu(2)   | 146.1(6) |
| Mo(6)-O(30)-Cu(1)    | 141.4(5) | Mo(2)-O(5)-Cu(1)    | 146.5(5) |
| C(8)-O(27)-Cu(1)     | 131(3)   |                     |          |

Symmetry transformations used to generate equivalent atoms for 2: #1  $-x+1, -y+1, -z$ ; #2  $-x+2, -y, -z+1$ ; #3  $x, y+1, z+1$ ; #4  $x, y, z+1$ ; #5  $x, y-1, z-1$ ; #6  $x, y, z-1$ ; #7  $-x+1, -y+1, -z+1$ .

### Compound 3

|                   |          |                 |          |
|-------------------|----------|-----------------|----------|
| Cu(1)-N(1)#3      | 1.867(3) | Cu(1)-N(1)      | 1.867(3) |
| N(1)#3-Cu(1)-N(1) | 180.0    | C(6)-N(1)-Cu(1) | 123.2(2) |
| C(7)-N(1)-Cu(1)   | 126.8(2) |                 |          |

Symmetry transformations used to generate equivalent atoms for 2: #1  $x, -y-2, z-1/2$ ; #2  $-x+1, -y-2, -z+1$ ; #3  $-x+1/2, -y-1/2$ ; #4  $x, -y-2, z+1/2$ ; #5  $-x+1, y, -z+1/2$ .

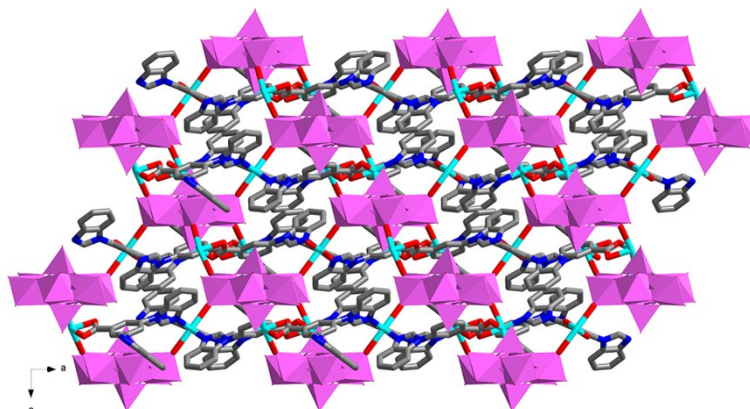

**Fig. S1** The 3D framework structure of compound 1.

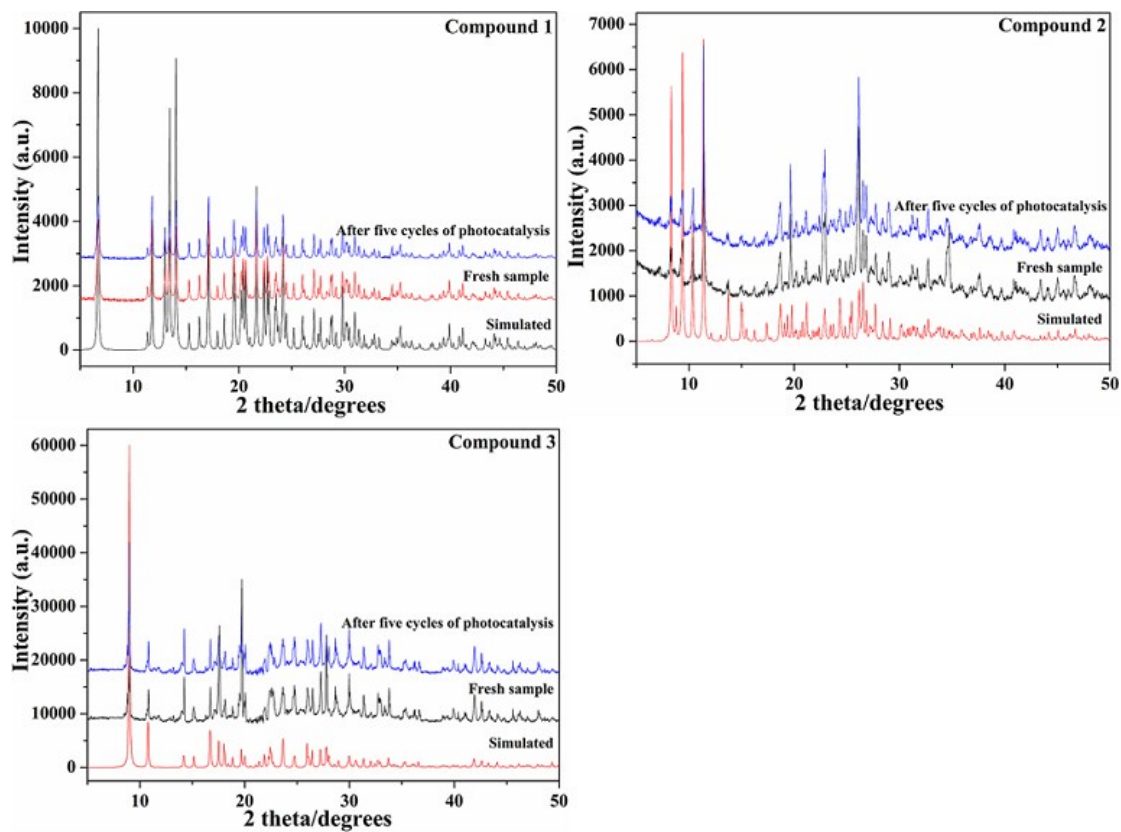

Fig. S2 The XRD patterns of compounds 1-3.

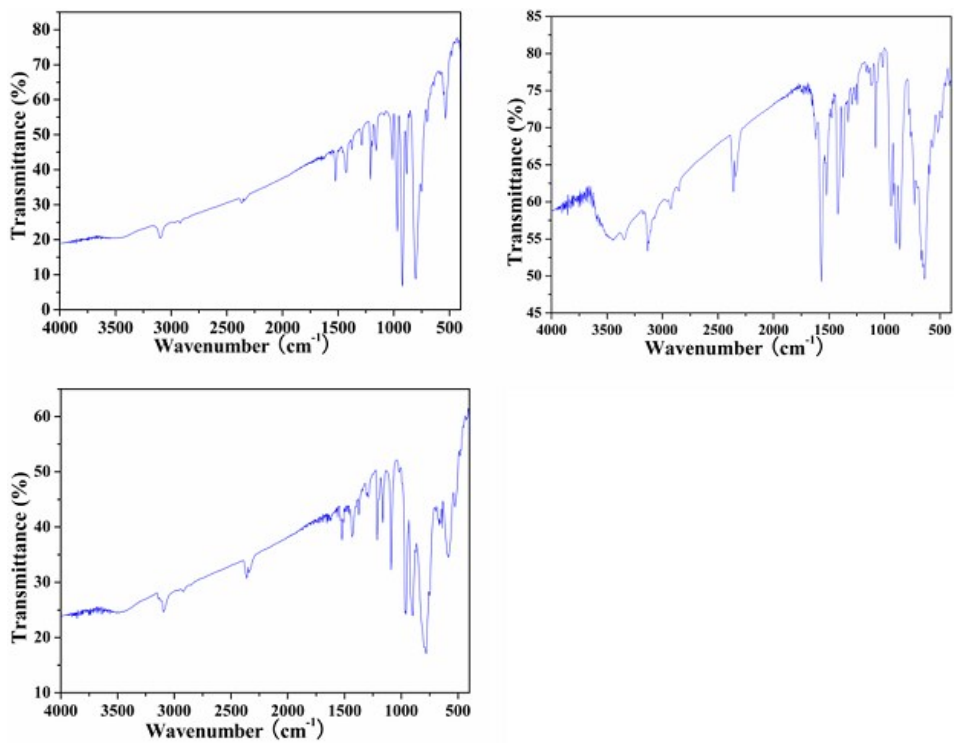

Fig. S3 The IR spectra of compounds 1-3.

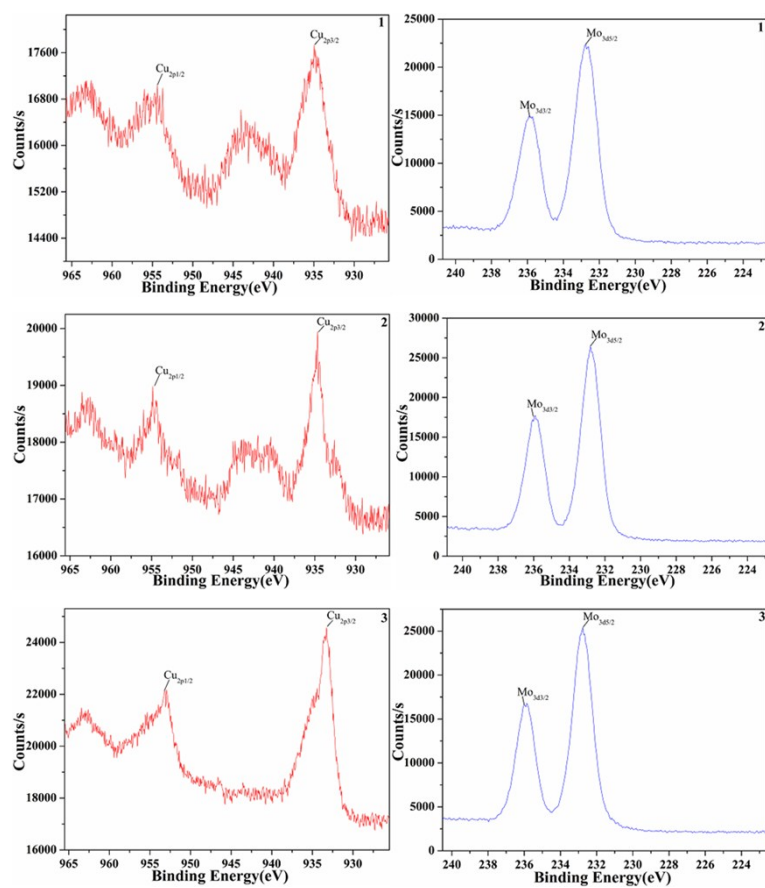

**Fig. S4** The XPS spectra of compounds **1-3**.

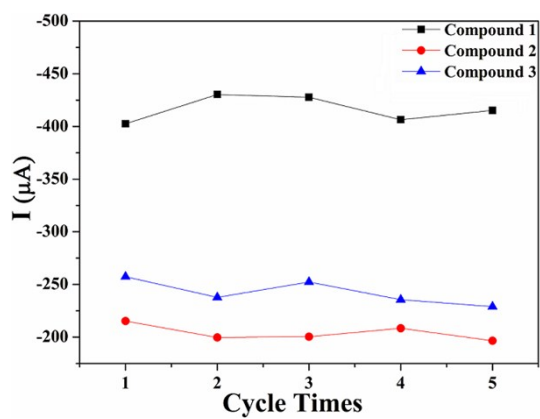

**Fig. S5** The electrocatalytic reduction of hydrogen peroxide with **1-CPE**, **2-CPE** and **3-CPE** after five cycles.

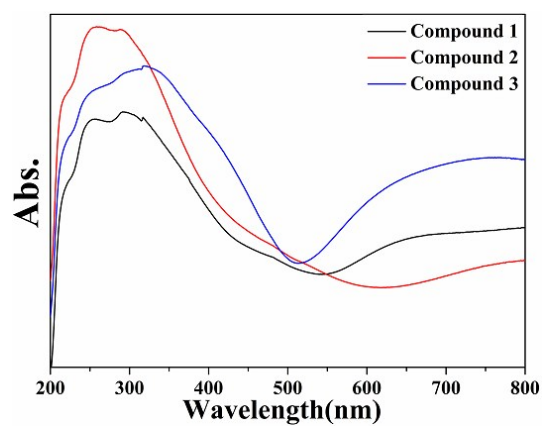

**Fig. S6** The diffuse reflection spectra of compounds **1-3** in the crystalline state.

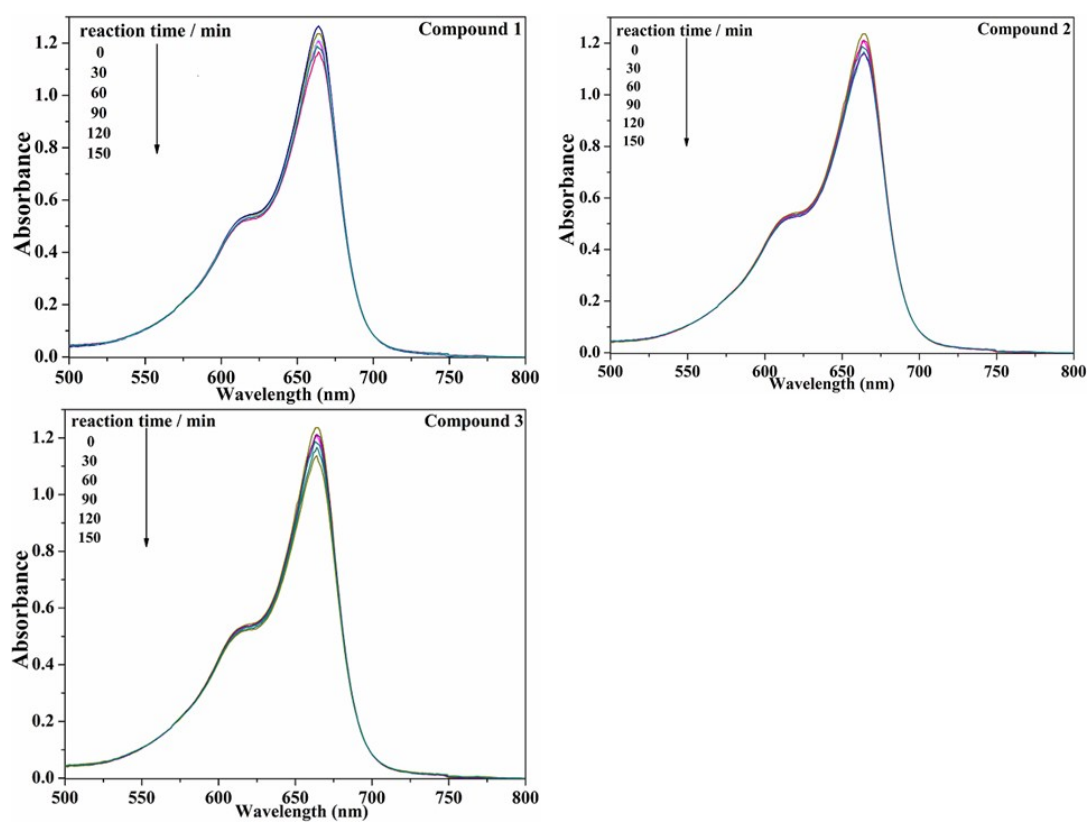

**Fig. S7** The absorption spectra of the MB solution at the presence of compounds **1-3** in the dark.
